# Supplementary material
Source: publisher figshare collection journal article supplement (https://karger.figshare.com/articles/dataset/_/5104495)
Supplement: Supplementary file 1 [file 1]

Archive with 3 entries (3 files):
- SupplTable1.pdf
- SupplTable2.pdf
- SupplTable3.pdf
