# Supplementary material
Source: publisher figshare collection journal article supplement (https://karger.figshare.com/articles/dataset/_/5104495)
Supplement: Supplementary file 1 [file 1 › SupplTable1.pdf]

**Supplemental Table 1. Northern genes and probes**

| Nr. | Gene name | Accession    | Probe between 5' to 3' |
|-----|-----------|--------------|------------------------|
| 1   | 18s rRNA  | M10098       | 951 to 1458            |
| 2   | SELE      | NM_000450    | 1146 to 1451           |
| 3   | VCAM1     | NM_001078    | 1527 to 1721           |
| 4   | ICAM1     | NM_000201    | 1548 to 1902           |
| 5   | F3        | NM_001993    | 285 to 536             |
| 6   | SERPINE1  | NM_000602    | 468 to 763             |
| 7   | TXNRD2    | NM_145747    | 542 to 820             |
| 8   | CCL2      | NM_002982    | 107 to 374             |
| 9   | CCL20     | NM_004591    | 11 to 279              |
| 10  | CXCL2     | NM_002089    | 377 to 800             |
| 11  | CXCL6     | NM_002993    | 374 to 821             |
| 12  | IL6       | NM_000600    | 313 to 827             |
| 13  | IL8       | NM_000584    | 47 to 344              |
| 14  | CXCL1     | NM_001511    | 33 to 423              |
| 15  | CX3CL1    | NM_002996    | 79 to 322              |
| 16  | CSF2      | NM_000758    | 107 to 374             |
| 17  | CSF3      | NM_172219    | 492 to 867             |
| 18  | CD14      | NM_000591    | 595 to 872             |
| 19  | SOD2      | NM_000636    | 262 to 583             |
| 20  | MMP10     | NM_002425    | 38 to 439              |
| 21  | TNFAIP3   | NM_006290    | 106 to 459             |
| 22  | STAT3     | NM_003150    | 236 to 778             |
| 23  | STAT6     | NM_003153    | 520 to 900             |
| 24  | IRF1      | NM_002198    | 533 to 935             |
| 25  | IFIT1     | NM_001001887 | 255 to 756             |
| 26  | NFKBIA    | NM_020529    | 539 to 932             |
| 27  | RGS2      | NM_002923    | 275 to 732             |
| 28  | RGS4      | NM_005613    | 195 to 510             |
| 29  | CEBPB     | NM_005195    | 263 to 734             |
| 30  | MAPK1     | NM_002745    | 451 to 910             |
| 31  | GRLF1     | NM_004491    | 136 to 561             |
