# Supplementary material
Source: publisher figshare collection journal article supplement (https://karger.figshare.com/articles/dataset/_/5104495)
Supplement: Supplementary file 1 [file 1 › SupplTable2.pdf]

Supplemental Table 2  
(Increase with TNF- $\gamma$  but not LPS)

| Gene                     | Description                                                                              | LPS | TNF |
|--------------------------|------------------------------------------------------------------------------------------|-----|-----|
| YIP-1P                   | putative transmembrane protein; homolog of yeast Golgi membrane protein                  | NNN | III |
| tyrosylprotien (TPST1)   | tyrosylprotein sulfotransferase 1                                                        | NNN | III |
| copper transporter       | solute carrier family 31 (copper transporters)                                           | NNN | III |
| H1FX                     | H1 histone family, member X                                                              | NNN | III |
| WWW-binding              | WW domain binding protein-2                                                              | NNN | III |
| NFKBIB                   | nuclear factor of kappa light polypeptide gene enhancer in B-cells inhibitor, beta       | NNN | III |
| BCL3                     | B-cell CLLlymphoma 3 (BCL3)                                                              | NNI | III |
| UK                       | Unknown (protein for MGC:4693)                                                           | NNI | III |
| UK                       | unknown                                                                                  | NNI | III |
| Porsome,macropain        | proteasome (prosome, macropain) subunit, beta type, 9 (large multifunctional protease 2) | NIN | III |
| sjogren syndrome antigen | Sjogren syndrome antigen A1 (52kD, ribonucleoprotein autoantigen SS-ARo) (SSA1)          | NIN | III |
| homeo box analog 1       | msh (Drosophila) homeo box homolog 1 (formerly homeo box 7) (MSX1)                       | NIN | III |
| LZIP                     | basic leucine zipper protein LZIP                                                        | NIN | III |
| PML-1                    | Human PML-1, promyelocytic leukemia                                                      | NIN | III |
| XBP1                     | X-box binding protein 1                                                                  | INN | III |
| STAT-6                   | signal transducer and activator of transcription 6, interleukin-4 induced                | INN | III |
| adducin                  | adducin 3 (gamma)                                                                        | INN | III |
| B2M                      | beta-2-microglobulin 1                                                                   | INN | III |
| CSK                      | c-src tyrosine kinase (CSK)                                                              | INN | III |
| MYC                      | v-myc avian myelocytomatosis viral oncogene homolog                                      | INN | III |
| UK                       | unknown                                                                                  | INN | III |
| UVRAG                    | UV radiation resistance associated gene                                                  | INN | III |
| P2XR4                    | purinergic receptor P2X, ligand-gated ion channel, 4                                     | INN | III |
| Asparagine synthetase    | asparagine synthetase                                                                    | INN | III |
| NUDEL (endoleptidase)    | LIS1-interacting protein NUDEL; endooligopeptidase A                                     | INN | III |
| IPL                      | tumor suppressing subtransferable candidate 3                                            | INN | III |
| UK                       | Unknown                                                                                  | INN | III |
| UK                       | unknown                                                                                  | INN | III |
