# Supplementary material
Source: publisher figshare collection journal article supplement (https://karger.figshare.com/articles/dataset/_/5104495)
Supplement: Supplementary file 1 [file 1 › SupplTable3.pdf]

Supplemental Table 3  
Decreased by TFN- $\alpha$  but not by LPS

| Gene     | Description                                                                             | LPS | TNF- $\alpha$ |
|----------|-----------------------------------------------------------------------------------------|-----|---------------|
| DNAJB1   | heat shock 40kD protein 1 ,(HSPF1),(Hsp40)                                              | NNN | DDD           |
| FKBP4    | FK506-binding protein 4                                                                 | NNN | DDD           |
| SLC20A1  | solute carrier family 20 (phosphate transporter), member 1                              | NNN | DDD           |
| DAF      | decay accelerating factor for complement (CD55, Cromer blood group system)              | NNN | DDD           |
| SSFA2    | sperm specific antigen 2                                                                | NNN | DDD           |
| TOB1     | transducer of ERBB2                                                                     | NNN | DDD           |
| CHC1     | chromosome condensation 1                                                               | NNN | DDD           |
| REV3L    | REV3 (yeast homolog)-like, catalytic subunit of DNA polymerase zeta                     | NNN | DDD           |
| STX7     | unknown                                                                                 | NNN | DDD           |
| CTDSPL   | HYA22 protein (HYA22)                                                                   | NND | DDD           |
| LYN      | v-yes-1 Yamaguchi sarcoma viral related oncogene homolog                                | NND | DDD           |
| FAM8A1   | Autosomal Highly Conserved Protein (AHCP)                                               | NND | DDD           |
| GGA2     | Golgi-associated, gamma-adaptin ear containing, ARF-binding protein 2                   | NND | DDD           |
| ESD      | Similar to esterase 10, esterase Dformylglutathione hydrolase                           | NND | DDD           |
| PRKCBP1  | protein kinase C binding protein 1                                                      | NND | DDD           |
| LAMB1    | laminin, beta 1                                                                         | NDN | DDD           |
| TRB2     | GS3955 protein                                                                          | NDN | DDD           |
| PKD2     | polycystic kidney disease 2 (autosomal dominant) (PKD2)                                 | NDN | DDD           |
| RFC4     | eplication factor C (activator 1) 4                                                     | NDN | DDD           |
| EPHA4    | unknown                                                                                 | NDN | DDD           |
| TEK      | tyrosine kinase, endothelial (venous malformations, multiple cutaneous and mucosal)     | NDN | DDD           |
| FLNB     | thyroid autoantigen (truncated actin-binding protein)                                   | NDN | DDD           |
| FADS1    | fatty acid desaturase                                                                   | NDN | DDD           |
| AKR1C3   | aldo-keto reductase family 1, member C3 (3-alpha hydroxysteroid dehydrogenase, type II) | NDN | DDD           |
| KIAA0436 | putative L-type neutral amino acid transporter                                          | NDN | DDD           |

|           |                                                                                          |     |     |
|-----------|------------------------------------------------------------------------------------------|-----|-----|
| FLJ21940  | unknown                                                                                  | NDN | DDD |
| STAT1     | signal transducer and activator of transcription                                         | DNN | DDD |
| PIP5K2B   | phosphatidylinositol-4-phosphate 5-kinase, type II, beta                                 | DNN | DDD |
| ENO2      | enolase 2, (gamma, neuronal) (ENO2)                                                      | DNN | DDD |
| MLLT2     | myeloidlymphoid or mixed-lineage leukemia (trithorax (Drosophila) homolog)               | DNN | DDD |
| TACSTD2   | gastrointestinal tumor-associated antigen , tumor-associated calcium signal transducer 2 | DNN | DDD |
| SMARCA3   | SWISNF related, matrix associated, actin dependent regulator of chromatin+B33            | DNN | DDD |
| DAPK1     | death-associated protein kinase 1                                                        | DNN | DDD |
| NT5E      | 5 nucleotidase (CD73) (NT5)                                                              | DNN | DDD |
| GNG11     | guanine nucleotide binding protein 11                                                    | DNN | DDD |
| PPM1D     | protein phosphatase 1D magnesium-dependent, delta isoform                                | DNN | DDD |
| ARK5      | unknown                                                                                  | DNN | DDD |
| SMARCA2   | SWISNF related, matrix associated, actin dependent regulator of chromatin                | DNN | DDD |
| CDKN1B    | Similar to cyclin-dependent kinase inhibitor 1B (p27, Kip1)                              | DNN | DDD |
| CLECSF2   | Similar to C-type (calcium dependent, carbohydrate-recognition domain) lectin            | DNN | DDD |
| HOXA9     | homeo box A9                                                                             | DNN | DDD |
| TP53AP1   | TP53 target gene                                                                         | DNN | DDD |
| MTSG1     | unknown                                                                                  | DNN | DDD |
| KIAA0657  | unknown                                                                                  | DNN | DDD |
| PVRL3     | unknown                                                                                  | DNN | DDD |
| BA108L7.2 | similar to rat tricarboxylate carrier-like protein (BA108L7.2)                           | DNN | DDD |
| EVI1      | highly similar to S69002 human mRNA for AML1-EVI-1                                       | DNN | DDD |
